# Supplementary material for: MiRNAs as Biomarkers of Myocardial Infarction: A Meta-Analysis
Source: PubMed Central journal article supplement (PMC3922900; doi:10.1371/journal.pone.0088566), 2014-02-12
Supplement: pone.0088566.s001.pdf [file pone.0088566.s001.pdf]

**Table S1.** All characteristics of all studies on the use of miRNAs as diagnostic biomarkers of myocardial infarction

| Study (author, year, reference)      | miRNA biomarker (fold change)                            | Study design (location and setting)                        | Study population (number, age, sex; m/f)                                                                                               | Source                                                                                 | AMI diagnosis | miRNA (1) Isolation (2) Detection (3) Normalization                                                                                                                                                                                                           | Multivariate analysis                                                                                                                           | Quality score | Time of blood sampling | Base level (fold)                                                                                                                                                                                                                                                                                                                                                                                                                                                                                                                                                                                                                                                                                                                                                                                                                                                                                                                                                                                                                                                                                                                                                                                                                                                                                                                                                                                                                                                                                                                                                                                                                                                                                                                                                                                                                                                                                                                                                                                                                                                                                                                                                                                                                                                                                                                                                                                                                           | Time of measurable increase | Peak level (fold)                                                                                              | Peak time                       | Duration                                                                  | Sensitivity                                                                                                                                                                                                                                                                                                                                                                                                                                                                                                                                                                                                                                                                                                                                                                                                                                                                                                                                                                                                                                                                                                                                                                                                                                                                                                                                                                                                                                                                                                                                                                                                                                                                                                                                                                                                                                                                                                                                                                                                                                                                                                                                                                                                                                                                                                                                                                                                                                                                                                                                                                                                                                                                                                                                                                                                                                                                                                                                                                                                                                                                                                                                                                                                                                                                                                                                                                                                                                                                                                                                                                                                                                                                                                                                                                                                                                                                                                                                                                                                                                                                                                                                                                                                                                                                                                                                                                                                                                                                                                                                                                                                                                                                                                                                                                                                                                                                                                                                                                                                                                                                                                                                                                                                                                                                                                                                                                                                                                                                                                                                                                                                                                                                                                                                                                                                                                                                                                                                                                                                                                                                                                                                                                                                                                                                                        | Specificity                                                               | AUC                              |                                  |
|--------------------------------------|----------------------------------------------------------|------------------------------------------------------------|----------------------------------------------------------------------------------------------------------------------------------------|----------------------------------------------------------------------------------------|---------------|---------------------------------------------------------------------------------------------------------------------------------------------------------------------------------------------------------------------------------------------------------------|-------------------------------------------------------------------------------------------------------------------------------------------------|---------------|------------------------|---------------------------------------------------------------------------------------------------------------------------------------------------------------------------------------------------------------------------------------------------------------------------------------------------------------------------------------------------------------------------------------------------------------------------------------------------------------------------------------------------------------------------------------------------------------------------------------------------------------------------------------------------------------------------------------------------------------------------------------------------------------------------------------------------------------------------------------------------------------------------------------------------------------------------------------------------------------------------------------------------------------------------------------------------------------------------------------------------------------------------------------------------------------------------------------------------------------------------------------------------------------------------------------------------------------------------------------------------------------------------------------------------------------------------------------------------------------------------------------------------------------------------------------------------------------------------------------------------------------------------------------------------------------------------------------------------------------------------------------------------------------------------------------------------------------------------------------------------------------------------------------------------------------------------------------------------------------------------------------------------------------------------------------------------------------------------------------------------------------------------------------------------------------------------------------------------------------------------------------------------------------------------------------------------------------------------------------------------------------------------------------------------------------------------------------------|-----------------------------|----------------------------------------------------------------------------------------------------------------|---------------------------------|---------------------------------------------------------------------------|----------------------------------------------------------------------------------------------------------------------------------------------------------------------------------------------------------------------------------------------------------------------------------------------------------------------------------------------------------------------------------------------------------------------------------------------------------------------------------------------------------------------------------------------------------------------------------------------------------------------------------------------------------------------------------------------------------------------------------------------------------------------------------------------------------------------------------------------------------------------------------------------------------------------------------------------------------------------------------------------------------------------------------------------------------------------------------------------------------------------------------------------------------------------------------------------------------------------------------------------------------------------------------------------------------------------------------------------------------------------------------------------------------------------------------------------------------------------------------------------------------------------------------------------------------------------------------------------------------------------------------------------------------------------------------------------------------------------------------------------------------------------------------------------------------------------------------------------------------------------------------------------------------------------------------------------------------------------------------------------------------------------------------------------------------------------------------------------------------------------------------------------------------------------------------------------------------------------------------------------------------------------------------------------------------------------------------------------------------------------------------------------------------------------------------------------------------------------------------------------------------------------------------------------------------------------------------------------------------------------------------------------------------------------------------------------------------------------------------------------------------------------------------------------------------------------------------------------------------------------------------------------------------------------------------------------------------------------------------------------------------------------------------------------------------------------------------------------------------------------------------------------------------------------------------------------------------------------------------------------------------------------------------------------------------------------------------------------------------------------------------------------------------------------------------------------------------------------------------------------------------------------------------------------------------------------------------------------------------------------------------------------------------------------------------------------------------------------------------------------------------------------------------------------------------------------------------------------------------------------------------------------------------------------------------------------------------------------------------------------------------------------------------------------------------------------------------------------------------------------------------------------------------------------------------------------------------------------------------------------------------------------------------------------------------------------------------------------------------------------------------------------------------------------------------------------------------------------------------------------------------------------------------------------------------------------------------------------------------------------------------------------------------------------------------------------------------------------------------------------------------------------------------------------------------------------------------------------------------------------------------------------------------------------------------------------------------------------------------------------------------------------------------------------------------------------------------------------------------------------------------------------------------------------------------------------------------------------------------------------------------------------------------------------------------------------------------------------------------------------------------------------------------------------------------------------------------------------------------------------------------------------------------------------------------------------------------------------------------------------------------------------------------------------------------------------------------------------------------------------------------------------------------------------------------------------------------------------------------------------------------------------------------------------------------------------------------------------------------------------------------------------------------------------------------------------------------------------------------------------------------------------------------------------------------------------------------------------------------------------------------------------------------------------------|---------------------------------------------------------------------------|----------------------------------|----------------------------------|
| Adachi, T. et al. 2010 [11]          | miR-499-1                                                | Japan<br>Hospital admission                                | 9 patients with AMI<br>Age: 66.3±9.39<br>Sex (m/f): 6/3                                                                                | 10 healthy adults<br>Age: 41.5±6.0<br>Sex (m/f): 5/5                                   | Plasma        | None                                                                                                                                                                                                                                                          | (1) miRNA PARIS kit<br>(2) qPCR, TaqMan<br>(3) Small nuclear RNA U6                                                                             | No            | 5                      | <48 h                                                                                                                                                                                                                                                                                                                                                                                                                                                                                                                                                                                                                                                                                                                                                                                                                                                                                                                                                                                                                                                                                                                                                                                                                                                                                                                                                                                                                                                                                                                                                                                                                                                                                                                                                                                                                                                                                                                                                                                                                                                                                                                                                                                                                                                                                                                                                                                                                                       | —                           | <48 h                                                                                                          | 6–12 h                          | Before discharge                                                          | 1.00                                                                                                                                                                                                                                                                                                                                                                                                                                                                                                                                                                                                                                                                                                                                                                                                                                                                                                                                                                                                                                                                                                                                                                                                                                                                                                                                                                                                                                                                                                                                                                                                                                                                                                                                                                                                                                                                                                                                                                                                                                                                                                                                                                                                                                                                                                                                                                                                                                                                                                                                                                                                                                                                                                                                                                                                                                                                                                                                                                                                                                                                                                                                                                                                                                                                                                                                                                                                                                                                                                                                                                                                                                                                                                                                                                                                                                                                                                                                                                                                                                                                                                                                                                                                                                                                                                                                                                                                                                                                                                                                                                                                                                                                                                                                                                                                                                                                                                                                                                                                                                                                                                                                                                                                                                                                                                                                                                                                                                                                                                                                                                                                                                                                                                                                                                                                                                                                                                                                                                                                                                                                                                                                                                                                                                                                                               | 1.00                                                                      | —                                |                                  |
| Al, J. et al. 2010 [12]              | miR-1                                                    | China<br>Hospital admission                                | 93 patients with AMI<br>Age: 58.2±10.2<br>Sex (m/f): 67/26                                                                             | 66 healthy adults<br>Age: 55.1±9.6<br>Sex (m/f): 39/27                                 | Plasma        | Ischemic symptoms; increased cTnI and CK-MB; pathological Q wave                                                                                                                                                                                              | (1) miRNA miRNA isolation kit<br>(2) qPCR<br>(3) Small nuclear RNA U6                                                                           | No            | 6                      | —                                                                                                                                                                                                                                                                                                                                                                                                                                                                                                                                                                                                                                                                                                                                                                                                                                                                                                                                                                                                                                                                                                                                                                                                                                                                                                                                                                                                                                                                                                                                                                                                                                                                                                                                                                                                                                                                                                                                                                                                                                                                                                                                                                                                                                                                                                                                                                                                                                           | —                           | —                                                                                                              | —                               | —                                                                         | 0.73                                                                                                                                                                                                                                                                                                                                                                                                                                                                                                                                                                                                                                                                                                                                                                                                                                                                                                                                                                                                                                                                                                                                                                                                                                                                                                                                                                                                                                                                                                                                                                                                                                                                                                                                                                                                                                                                                                                                                                                                                                                                                                                                                                                                                                                                                                                                                                                                                                                                                                                                                                                                                                                                                                                                                                                                                                                                                                                                                                                                                                                                                                                                                                                                                                                                                                                                                                                                                                                                                                                                                                                                                                                                                                                                                                                                                                                                                                                                                                                                                                                                                                                                                                                                                                                                                                                                                                                                                                                                                                                                                                                                                                                                                                                                                                                                                                                                                                                                                                                                                                                                                                                                                                                                                                                                                                                                                                                                                                                                                                                                                                                                                                                                                                                                                                                                                                                                                                                                                                                                                                                                                                                                                                                                                                                                                               | 0.88                                                                      | 0.774                            |                                  |
| Chang, Y. et al. 2010 [13]           | miR-1                                                    | China<br>Hospital admission                                | 31 patients with AMI<br>Age: 57±6.1<br>Sex (m/f): 18/13                                                                                | 20 non-AMI with at least one vessel disease patients<br>Age: 62±13<br>Sex (m/f): 20/12 | Serum         | Chest pain characteristic of myocardial infarction lasting 30 min or more; ST segment elevation within 4 h of chest pain at at least 1.1 mV in at least two leads of the ECG                                                                                  | (1) miRNA PARIS isolation kit<br>(2) qPCR<br>(3) miR-1                                                                                          | No            | 8                      | 8.5 ± 3.82 h                                                                                                                                                                                                                                                                                                                                                                                                                                                                                                                                                                                                                                                                                                                                                                                                                                                                                                                                                                                                                                                                                                                                                                                                                                                                                                                                                                                                                                                                                                                                                                                                                                                                                                                                                                                                                                                                                                                                                                                                                                                                                                                                                                                                                                                                                                                                                                                                                                | 1                           | 100                                                                                                            | 6 h                             | 7 days                                                                    | —                                                                                                                                                                                                                                                                                                                                                                                                                                                                                                                                                                                                                                                                                                                                                                                                                                                                                                                                                                                                                                                                                                                                                                                                                                                                                                                                                                                                                                                                                                                                                                                                                                                                                                                                                                                                                                                                                                                                                                                                                                                                                                                                                                                                                                                                                                                                                                                                                                                                                                                                                                                                                                                                                                                                                                                                                                                                                                                                                                                                                                                                                                                                                                                                                                                                                                                                                                                                                                                                                                                                                                                                                                                                                                                                                                                                                                                                                                                                                                                                                                                                                                                                                                                                                                                                                                                                                                                                                                                                                                                                                                                                                                                                                                                                                                                                                                                                                                                                                                                                                                                                                                                                                                                                                                                                                                                                                                                                                                                                                                                                                                                                                                                                                                                                                                                                                                                                                                                                                                                                                                                                                                                                                                                                                                                                                                  | —                                                                         | —                                |                                  |
| Corsten, M.F. et al. 2010 [14]       | miR-208b-1<br>miR-499-1                                  | The Netherlands; Belgium; Luxembourg<br>Hospital admission | 32 patients with AMI<br>Age: 62±13<br>Sex (m/f): 20/12                                                                                 | 36 non-AMI with atypical chest pain patients<br>Age: 62±13<br>Sex (m/f): 20/12         | Plasma        | ST segment elevation or depression<br>ST segment elevation and ST-T up to greater than 2-fold the upper limit of normal                                                                                                                                       | (1) miRNA PARIS kit<br>(2) qPCR, miScript kit<br>(3) 3 C elegans spike-in miRNAs                                                                | No            | 7                      | 8.5 ± 3.82 h<br><12 h of onset of chest pain                                                                                                                                                                                                                                                                                                                                                                                                                                                                                                                                                                                                                                                                                                                                                                                                                                                                                                                                                                                                                                                                                                                                                                                                                                                                                                                                                                                                                                                                                                                                                                                                                                                                                                                                                                                                                                                                                                                                                                                                                                                                                                                                                                                                                                                                                                                                                                                                | 1<br>1<br>1                 | 100<br>1460<br>1420                                                                                            | 6 h<br><12 h<br><12 h           | 7 days<br>—<br>—                                                          | —<br>0.91<br>0.85                                                                                                                                                                                                                                                                                                                                                                                                                                                                                                                                                                                                                                                                                                                                                                                                                                                                                                                                                                                                                                                                                                                                                                                                                                                                                                                                                                                                                                                                                                                                                                                                                                                                                                                                                                                                                                                                                                                                                                                                                                                                                                                                                                                                                                                                                                                                                                                                                                                                                                                                                                                                                                                                                                                                                                                                                                                                                                                                                                                                                                                                                                                                                                                                                                                                                                                                                                                                                                                                                                                                                                                                                                                                                                                                                                                                                                                                                                                                                                                                                                                                                                                                                                                                                                                                                                                                                                                                                                                                                                                                                                                                                                                                                                                                                                                                                                                                                                                                                                                                                                                                                                                                                                                                                                                                                                                                                                                                                                                                                                                                                                                                                                                                                                                                                                                                                                                                                                                                                                                                                                                                                                                                                                                                                                                                                  | —<br>0.89<br>0.89                                                         | —<br>0.94<br>0.98                |                                  |
| D'Alessandro, V. et al. 2010 [15]    | miR-1<br>miR-133a-1<br>miR-499-5p<br>miR-122-1<br>miR-21 | Italy<br>Hospital admission                                | 33 STEMI patients<br>Age: 46.1±13.9<br>Sex (m/f): 13/4<br>25 patients<br>Age: 57.2±8.6<br>Sex (m/f): 24/1<br>8 patients<br>Age: 61.4±9 | 17 healthy people<br>Age: 46.1±13.9<br>Sex (m/f): 13/4                                 | Plasma        | CTnI; acute anterior STEMI undergoing PPCI, late symptom-to-balloon < 2 h and < 12 h; EF post PCI = 45%; TIMI flow > 2 post PPCI                                                                                                                              | (1) TRIzol LS reagent, miRNA PARIS, miRNA NGS kit<br>(2) qPCR, TaqMan<br>(3) miR-150                                                            | Yes (age)     | 9                      | Group1: 25 patients<br>517 ± 309 pmol/day 5, day 30<br>Group 2: 8 patients<br>156 ± 72 pmol at the onset of symptoms and again at 3, 9, 15, 21, 33, 45, and 60 h                                                                                                                                                                                                                                                                                                                                                                                                                                                                                                                                                                                                                                                                                                                                                                                                                                                                                                                                                                                                                                                                                                                                                                                                                                                                                                                                                                                                                                                                                                                                                                                                                                                                                                                                                                                                                                                                                                                                                                                                                                                                                                                                                                                                                                                                            | Group 1<br>Group 2          | Group 1<br>Group 2                                                                                             | Group 1<br>Group 2              | Group 1 and Group 2<br>ALL                                                | ALL                                                                                                                                                                                                                                                                                                                                                                                                                                                                                                                                                                                                                                                                                                                                                                                                                                                                                                                                                                                                                                                                                                                                                                                                                                                                                                                                                                                                                                                                                                                                                                                                                                                                                                                                                                                                                                                                                                                                                                                                                                                                                                                                                                                                                                                                                                                                                                                                                                                                                                                                                                                                                                                                                                                                                                                                                                                                                                                                                                                                                                                                                                                                                                                                                                                                                                                                                                                                                                                                                                                                                                                                                                                                                                                                                                                                                                                                                                                                                                                                                                                                                                                                                                                                                                                                                                                                                                                                                                                                                                                                                                                                                                                                                                                                                                                                                                                                                                                                                                                                                                                                                                                                                                                                                                                                                                                                                                                                                                                                                                                                                                                                                                                                                                                                                                                                                                                                                                                                                                                                                                                                                                                                                                                                                                                                                                | ALL                                                                       | ALL                              |                                  |
| Gidof, O. et al. 2011 [16]           | miR-1<br>miR-133a-1<br>miR-208b-1<br>miR-499-5p          | Sweden<br>Hospital admission                               | 25 STEMI patients<br>Age: 59.6±12.7<br>Sex (m/f): 20/5                                                                                 | 11 healthy people<br>Age: 60.9±16.3<br>Sex (m/f): 7/4                                  | Plasma        | Patients undergoing primary percutaneous coronary intervention at Skane University Hospital Lund due to an STEMI were eligible for inclusion                                                                                                                  | (1) TRIzol LS reagent, miRNA PARIS, miRNA NGS kit<br>(2) qPCR<br>(3) C elegans spike-in miRNAs were normalized against the arbitrary unit of 40 | No            | 7                      | First within 2 h (<12 h, n=9) and >12 h, n=16) of onset of symptoms, second within 48 h, and third within 72 h.                                                                                                                                                                                                                                                                                                                                                                                                                                                                                                                                                                                                                                                                                                                                                                                                                                                                                                                                                                                                                                                                                                                                                                                                                                                                                                                                                                                                                                                                                                                                                                                                                                                                                                                                                                                                                                                                                                                                                                                                                                                                                                                                                                                                                                                                                                                             | ALL                         | <12 h<br><12 h<br><12 h<br>250                                                                                 | <12 h<br>>72 h<br>>72 h<br>1.00 | <12 h Patients, n = 9<br>controls, n = 11<br>0.82<br>0.86<br>1.00<br>0.99 | <12 h Patients, n = 9<br>controls, n = 11<br>0.86<br>0.96<br>1.00<br>0.99                                                                                                                                                                                                                                                                                                                                                                                                                                                                                                                                                                                                                                                                                                                                                                                                                                                                                                                                                                                                                                                                                                                                                                                                                                                                                                                                                                                                                                                                                                                                                                                                                                                                                                                                                                                                                                                                                                                                                                                                                                                                                                                                                                                                                                                                                                                                                                                                                                                                                                                                                                                                                                                                                                                                                                                                                                                                                                                                                                                                                                                                                                                                                                                                                                                                                                                                                                                                                                                                                                                                                                                                                                                                                                                                                                                                                                                                                                                                                                                                                                                                                                                                                                                                                                                                                                                                                                                                                                                                                                                                                                                                                                                                                                                                                                                                                                                                                                                                                                                                                                                                                                                                                                                                                                                                                                                                                                                                                                                                                                                                                                                                                                                                                                                                                                                                                                                                                                                                                                                                                                                                                                                                                                                                                          | <12 h Patients, n = 9<br>controls, n = 11<br>0.98<br>0.96<br>1.00<br>0.97 |                                  |                                  |
| Kuwabara, Y. et al. 2011 [17]        | miR-1<br>miR-133a-1<br>miR-499-5p                        | Japan<br>CCU admission                                     | 29 ACS (21 MI and 8 IAF)<br>Age: 69.7±2.4<br>Sex (m/f): 23/6                                                                           | 42 non-ACS people<br>Age: 67.8±2.4<br>Sex (m/f): 24/18                                 | Plasma        | CK-MB; cTnI; pathological Q wave; ST segment elevation or depression; chest pain                                                                                                                                                                              | (1) TRIzol LS reagent<br>(2) qPCR, TaqMan<br>(3) Small nuclear RNA U6                                                                           | No            | 8                      | miR-1<br><3 h, 3–9 h, 9–15 h, 15–21 h, >21 h<br>miR-133a<br><3 h, 3–9 h, 9–15 h, 15–21 h, >21 h<br>miR-499-5p<br>4 h, 4–8 h, 8–12 h, 12–16 h, 16–20 h, 20–24 h, 24–48 h, 48–72 h, 72–96 h, 96–144 h, 144–216 h, 216–360 h, 360–504 h, 504–720 h, 720–1008 h, 1008–1440 h, 1440–2160 h, 2160–3600 h, 3600–5040 h, 5040–7200 h, 7200–10080 h                                                                                                                                                                                                                                                                                                                                                                                                                                                                                                                                                                                                                                                                                                                                                                                                                                                                                                                                                                                                                                                                                                                                                                                                                                                                                                                                                                                                                                                                                                                                                                                                                                                                                                                                                                                                                                                                                                                                                                                                                                                                                                  | ALL                         | <3 h<br>ALL                                                                                                    | <3 h<br>ALL                     | <15 h<br>6.00                                                             | 0.96                                                                                                                                                                                                                                                                                                                                                                                                                                                                                                                                                                                                                                                                                                                                                                                                                                                                                                                                                                                                                                                                                                                                                                                                                                                                                                                                                                                                                                                                                                                                                                                                                                                                                                                                                                                                                                                                                                                                                                                                                                                                                                                                                                                                                                                                                                                                                                                                                                                                                                                                                                                                                                                                                                                                                                                                                                                                                                                                                                                                                                                                                                                                                                                                                                                                                                                                                                                                                                                                                                                                                                                                                                                                                                                                                                                                                                                                                                                                                                                                                                                                                                                                                                                                                                                                                                                                                                                                                                                                                                                                                                                                                                                                                                                                                                                                                                                                                                                                                                                                                                                                                                                                                                                                                                                                                                                                                                                                                                                                                                                                                                                                                                                                                                                                                                                                                                                                                                                                                                                                                                                                                                                                                                                                                                                                                               | 0.77                                                                      |                                  |                                  |
| Long, G. et al. 2012 [18]            | miR-126-1                                                | China<br>Hospital admission                                | 17 patients with AMI<br>Age: 53±12.5<br>Sex (m/f): 13/4                                                                                | 25 healthy adults<br>Age: 51±7.2<br>Sex (m/f): 14/11                                   | Plasma        | CK-MB; cTnI; pathological Q wave; ST segment elevation or depression; ischemic symptoms                                                                                                                                                                       | (1) TRIzol LS reagent<br>(2) qPCR<br>(3) Small nuclear RNA U6                                                                                   | No            | 7                      | miR-1<br><3 h (n = 30 min), 3 h (n = 30 min), 12 h (n = 30 min), 24 h (n = 30 min), 48 h (n = 30 min), 72 h (n = 30 min), and 1 w (n = 60 min) after the onset of symptoms                                                                                                                                                                                                                                                                                                                                                                                                                                                                                                                                                                                                                                                                                                                                                                                                                                                                                                                                                                                                                                                                                                                                                                                                                                                                                                                                                                                                                                                                                                                                                                                                                                                                                                                                                                                                                                                                                                                                                                                                                                                                                                                                                                                                                                                                  | ALL                         | <3 h<br>15.87 ± 4.5                                                                                            | 8 h                             | 1 w                                                                       | 4 h: 0.83, 8 h: 0.93, 12 h: 0.94, 24 h: 0.90, 48 h: 0.90, 72 h: 0.90, 96 h: 0.90, 120 h: 0.88, 144 h: 0.87, 168 h: 0.86, 192 h: 0.87, 216 h: 0.87, 240 h: 0.87, 264 h: 0.87, 288 h: 0.87, 312 h: 0.86, 336 h: 0.87, 360 h: 0.86, 384 h: 0.86, 408 h: 0.86, 432 h: 0.86, 456 h: 0.86, 480 h: 0.86, 504 h: 0.86, 528 h: 0.86, 552 h: 0.86, 576 h: 0.86, 600 h: 0.86, 624 h: 0.86, 648 h: 0.86, 672 h: 0.86, 700 h: 0.86, 720 h: 0.86, 744 h: 0.86, 768 h: 0.86, 792 h: 0.86, 816 h: 0.86, 840 h: 0.86, 864 h: 0.86, 888 h: 0.86, 912 h: 0.86, 936 h: 0.86, 960 h: 0.86, 984 h: 0.86, 1008 h: 0.86, 1032 h: 0.86, 1056 h: 0.86, 1080 h: 0.86, 1104 h: 0.86, 1128 h: 0.86, 1152 h: 0.86, 1176 h: 0.86, 1200 h: 0.86, 1224 h: 0.86, 1248 h: 0.86, 1272 h: 0.86, 1296 h: 0.86, 1320 h: 0.86, 1344 h: 0.86, 1368 h: 0.86, 1392 h: 0.86, 1416 h: 0.86, 1440 h: 0.86, 1464 h: 0.86, 1488 h: 0.86, 1512 h: 0.86, 1536 h: 0.86, 1560 h: 0.86, 1584 h: 0.86, 1608 h: 0.86, 1632 h: 0.86, 1656 h: 0.86, 1680 h: 0.86, 1704 h: 0.86, 1728 h: 0.86, 1752 h: 0.86, 1776 h: 0.86, 1800 h: 0.86, 1824 h: 0.86, 1848 h: 0.86, 1872 h: 0.86, 1900 h: 0.86, 1920 h: 0.86, 1944 h: 0.86, 1968 h: 0.86, 1992 h: 0.86, 2016 h: 0.86, 2040 h: 0.86, 2064 h: 0.86, 2088 h: 0.86, 2112 h: 0.86, 2136 h: 0.86, 2160 h: 0.86, 2184 h: 0.86, 2208 h: 0.86, 2232 h: 0.86, 2256 h: 0.86, 2280 h: 0.86, 2304 h: 0.86, 2328 h: 0.86, 2352 h: 0.86, 2376 h: 0.86, 2400 h: 0.86, 2424 h: 0.86, 2448 h: 0.86, 2472 h: 0.86, 2496 h: 0.86, 2520 h: 0.86, 2544 h: 0.86, 2568 h: 0.86, 2592 h: 0.86, 2616 h: 0.86, 2640 h: 0.86, 2664 h: 0.86, 2688 h: 0.86, 2712 h: 0.86, 2736 h: 0.86, 2760 h: 0.86, 2784 h: 0.86, 2808 h: 0.86, 2832 h: 0.86, 2856 h: 0.86, 2880 h: 0.86, 2904 h: 0.86, 2928 h: 0.86, 2952 h: 0.86, 2976 h: 0.86, 3000 h: 0.86, 3024 h: 0.86, 3048 h: 0.86, 3072 h: 0.86, 3096 h: 0.86, 3120 h: 0.86, 3144 h: 0.86, 3168 h: 0.86, 3192 h: 0.86, 3216 h: 0.86, 3240 h: 0.86, 3264 h: 0.86, 3288 h: 0.86, 3312 h: 0.86, 3336 h: 0.86, 3360 h: 0.86, 3384 h: 0.86, 3408 h: 0.86, 3432 h: 0.86, 3456 h: 0.86, 3480 h: 0.86, 3504 h: 0.86, 3528 h: 0.86, 3552 h: 0.86, 3576 h: 0.86, 3600 h: 0.86, 3624 h: 0.86, 3648 h: 0.86, 3672 h: 0.86, 3696 h: 0.86, 3720 h: 0.86, 3744 h: 0.86, 3768 h: 0.86, 3792 h: 0.86, 3816 h: 0.86, 3840 h: 0.86, 3864 h: 0.86, 3888 h: 0.86, 3912 h: 0.86, 3936 h: 0.86, 3960 h: 0.86, 3984 h: 0.86, 4008 h: 0.86, 4032 h: 0.86, 4056 h: 0.86, 4080 h: 0.86, 4104 h: 0.86, 4128 h: 0.86, 4152 h: 0.86, 4176 h: 0.86, 4200 h: 0.86, 4224 h: 0.86, 4248 h: 0.86, 4272 h: 0.86, 4296 h: 0.86, 4320 h: 0.86, 4344 h: 0.86, 4368 h: 0.86, 4392 h: 0.86, 4416 h: 0.86, 4440 h: 0.86, 4464 h: 0.86, 4488 h: 0.86, 4512 h: 0.86, 4536 h: 0.86, 4560 h: 0.86, 4584 h: 0.86, 4608 h: 0.86, 4632 h: 0.86, 4656 h: 0.86, 4680 h: 0.86, 4704 h: 0.86, 4728 h: 0.86, 4752 h: 0.86, 4776 h: 0.86, 4800 h: 0.86, 4824 h: 0.86, 4848 h: 0.86, 4872 h: 0.86, 4896 h: 0.86, 4920 h: 0.86, 4944 h: 0.86, 4968 h: 0.86, 4992 h: 0.86, 5016 h: 0.86, 5040 h: 0.86, 5064 h: 0.86, 5088 h: 0.86, 5112 h: 0.86, 5136 h: 0.86, 5160 h: 0.86, 5184 h: 0.86, 5208 h: 0.86, 5232 h: 0.86, 5256 h: 0.86, 5280 h: 0.86, 5304 h: 0.86, 5328 h: 0.86, 5352 h: 0.86, 5376 h: 0.86, 5400 h: 0.86, 5424 h: 0.86, 5448 h: 0.86, 5472 h: 0.86, 5496 h: 0.86, 5520 h: 0.86, 5544 h: 0.86, 5568 h: 0.86, 5592 h: 0.86, 5616 h: 0.86, 5640 h: 0.86, 5664 h: 0.86, 5688 h: 0.86, 5712 h: 0.86, 5736 h: 0.86, 5760 h: 0.86, 5784 h: 0.86, 5808 h: 0.86, 5832 h: 0.86, 5856 h: 0.86, 5880 h: 0.86, 5904 h: 0.86, 5928 h: 0.86, 5952 h: 0.86, 5976 h: 0.86, 6000 h: 0.86, 6024 h: 0.86, 6048 h: 0.86, 6072 h: 0.86, 6096 h: 0.86, 6120 h: 0.86, 6144 h: 0.86, 6168 h: 0.86, 6192 h: 0.86, 6216 h: 0.86, 6240 h: 0.86, 6264 h: 0.86, 6288 h: 0.86, 6312 h: 0.86, 6336 h: 0.86, 6360 h: 0.86, 6384 h: 0.86, 6408 h: 0.86, 6432 h: 0.86, 6456 h: 0.86, 6480 h: 0.86, 6504 h: 0.86, 6528 h: 0.86, 6552 h: 0.86, 6576 h: 0.86, 6600 h: 0.86, 6624 h: 0.86, 6648 h: 0.86, 6672 h: 0.86, 6696 h: 0.86, 6720 h: 0.86, 6744 h: 0.86, 6768 h: 0.86, 6792 h: 0.86, 6816 h: 0.86, 6840 h: 0.86, 6864 h: 0.86, 6888 h: 0.86, 6912 h: 0.86, 6936 h: 0.86, 6960 h: 0.86, 6984 h: 0.86, 7008 h: 0.86, 7032 h: 0.86, 7056 h: 0.86, 7080 h: 0.86, 7104 h: 0.86, 7128 h: 0.86, 7152 h: 0.86, 7176 h: 0.86, 7200 h: 0.86, 7224 h: 0.86, 7248 h: 0.86, 7272 h: 0.86, 7296 h: 0.86, 7320 h: 0.86, 7344 h: 0.86, 7368 h: 0.86, 7392 h: 0.86, 7416 h: 0.86, 7440 h: 0.86, 7464 h: 0.86, 7488 h: 0.86, 7512 h: 0.86, 7536 h: 0.86, 7560 h: 0.86, 7584 h: 0.86, 7608 h: 0.86, 7632 h: 0.86, 7656 h: 0.86, 7680 h: 0.86, 7704 h: 0.86, 7728 h: 0.86, 7752 h: 0.86, 7776 h: 0.86, 7800 h: 0.86, 7824 h: 0.86, 7848 h: 0.86, 7872 h: 0.86, 7900 h: 0.86, 7920 h: 0.86, 7944 h: 0.86, 7968 h: 0.86, 7992 h: 0.86, 8016 h: 0.86, 8032 h: 0.86, 8064 h: 0.86, 8080 h: 0.86, 8100 h: 0.86, 8120 h: 0.86, 8140 h: 0.86, 8160 h: 0.86, 8180 h: 0.86, 8200 h: 0.86, 8220 h: 0.86, 8240 h: 0.86, 8260 h: 0.86, 8280 h: 0.86, 8300 h: 0.86, 8320 h: 0.86, 8340 h: 0.86, 8360 h: 0.86, 8380 h: 0.86, 8400 h: 0.86, 8420 h: 0.86, 8440 h: 0.86, 8460 h: 0.86, 8480 h: 0.86, 8500 h: 0.86, 8520 h: 0.86, 8540 h: 0.86, 8560 h: 0.86, 8580 h: 0.86, 8600 h: 0.86, 8620 h: 0.86, 8640 h: 0.86, 8660 h: 0.86, 8680 h: 0.86, 8700 h: 0.86, 8720 h: 0.86, 8740 h: 0.86, 8760 h: 0.86, 8780 h: 0.86, 8800 h: 0.86, 8820 h: 0.86, 8840 h: 0.86, 8860 h: 0.86, 8880 h: 0.86, 8900 h: 0.86, 8920 h: 0.86, 8940 h: 0.86, 8960 h: 0.86, 8980 h: 0.86, 9000 h: 0.86, 9020 h: 0.86, 9040 h: 0.86, 9060 h: 0.86, 9080 h: 0.86, 9100 h: 0.86, 9120 h: 0.86, 9140 h: 0.86, 9160 h: 0.86, 9180 h: 0.86, 9200 h: 0.86, 9220 h: 0.86, 9240 h: 0.86, 9260 h: 0.86, 9280 h: 0.86, 9300 h: 0.86, 9320 h: 0.86, 9340 h: 0.86, 9360 h: 0.86, 9380 h: 0.86, 9400 h: 0.86, 9420 h: 0.86, 9440 h: 0.86, 9460 h: 0.86, 9480 h: 0.86, 9500 h: 0.86, 9520 h: 0.86, 9540 h: 0.86, 9560 h: 0.86, 9580 h: 0.86, 9600 h: 0.86, 9620 h: 0.86, 9640 h: 0.86, 9660 h: 0.86, 9680 h: 0.86, 9700 h: 0.86, 9720 h: 0.86, 9740 h: 0.86, 9760 h: 0.86, 9780 h: 0.86, 9800 h: 0.86, 9820 h: 0.86, 9840 h: 0.86, 9860 h: 0.86, 9880 h: 0.86, 9900 h: 0.86, 9920 h: 0.86, 9940 h: 0.86, 9960 h: 0.86, 9980 h: 0.86, 10000 h: 0.86 |                                                                           |                                  |                                  |
| Long, G. et al. 2012 [19]            | miR-30a-1<br>miR-195                                     | China<br>Hospital admission                                | 18 patients with AMI<br>Age: 55 ± 11.4<br>Sex (m/f): 13/5                                                                              | 30 healthy adults<br>Age: 50 ± 12.3<br>Sex (m/f): 17/13                                | Plasma        | CK-MB; cTnI; pathological Q wave; ST segment elevation or depression; ischemic symptoms                                                                                                                                                                       | (1) TRIzol LS reagent<br>(2) qPCR, GenScan mini kit<br>(3) Small nuclear RNA U6                                                                 | No            | 7                      | miR-30a-1<br><4 h (n = 30 min), 4 h (n = 30 min), 12 h (n = 30 min), 24 h (n = 30 min), 48 h (n = 30 min), 72 h (n = 30 min), and 1 w (n = 60 min) after the onset of symptoms                                                                                                                                                                                                                                                                                                                                                                                                                                                                                                                                                                                                                                                                                                                                                                                                                                                                                                                                                                                                                                                                                                                                                                                                                                                                                                                                                                                                                                                                                                                                                                                                                                                                                                                                                                                                                                                                                                                                                                                                                                                                                                                                                                                                                                                              | ALL                         | <4 h<br>4 h: 1.4±0.40<br>12 h: 1.3±0.45<br>24 h: 1.3±0.45<br>48 h: 1.3±0.45<br>72 h: 1.3±0.45<br>1 w: 1.3±0.45 | 10.48 ± 2.75                    | 8 h                                                                       | 1 w                                                                                                                                                                                                                                                                                                                                                                                                                                                                                                                                                                                                                                                                                                                                                                                                                                                                                                                                                                                                                                                                                                                                                                                                                                                                                                                                                                                                                                                                                                                                                                                                                                                                                                                                                                                                                                                                                                                                                                                                                                                                                                                                                                                                                                                                                                                                                                                                                                                                                                                                                                                                                                                                                                                                                                                                                                                                                                                                                                                                                                                                                                                                                                                                                                                                                                                                                                                                                                                                                                                                                                                                                                                                                                                                                                                                                                                                                                                                                                                                                                                                                                                                                                                                                                                                                                                                                                                                                                                                                                                                                                                                                                                                                                                                                                                                                                                                                                                                                                                                                                                                                                                                                                                                                                                                                                                                                                                                                                                                                                                                                                                                                                                                                                                                                                                                                                                                                                                                                                                                                                                                                                                                                                                                                                                                                                | 4 h: 0.88, 8 h: 0.88, 12 h: 0.88                                          | 4 h: 0.83, 8 h: 0.86, 12 h: 0.86 | 4 h: 0.88, 8 h: 0.86, 12 h: 0.88 |
| Mader, B. et al. 2011 [20]           | miR-1291-1<br>miR-629a-1<br>miR-30c-1<br>miR-145f        | Germany<br>CCU admission                                   | 20 STEMI patients<br>Age: 62.3±14.8<br>Sex (m/f): 16/4                                                                                 | 20 healthy adults<br>Age: 50 ± 12.3<br>Sex (m/f): 14/6                                 | Whole blood   | ESC/AHA redefined guidelines                                                                                                                                                                                                                                  | (1) miRNA Nucleo Spin miRNA<br>(2) qPCR, RiboSnp<br>(3) Small nuclear RNA RNU6-2                                                                | No            | 7                      | 3.0 ± 2.3 h after the onset of symptoms at 3 d and 4 d                                                                                                                                                                                                                                                                                                                                                                                                                                                                                                                                                                                                                                                                                                                                                                                                                                                                                                                                                                                                                                                                                                                                                                                                                                                                                                                                                                                                                                                                                                                                                                                                                                                                                                                                                                                                                                                                                                                                                                                                                                                                                                                                                                                                                                                                                                                                                                                      | ALL                         | ALL                                                                                                            | ALL                             | ALL                                                                       | 0.85                                                                                                                                                                                                                                                                                                                                                                                                                                                                                                                                                                                                                                                                                                                                                                                                                                                                                                                                                                                                                                                                                                                                                                                                                                                                                                                                                                                                                                                                                                                                                                                                                                                                                                                                                                                                                                                                                                                                                                                                                                                                                                                                                                                                                                                                                                                                                                                                                                                                                                                                                                                                                                                                                                                                                                                                                                                                                                                                                                                                                                                                                                                                                                                                                                                                                                                                                                                                                                                                                                                                                                                                                                                                                                                                                                                                                                                                                                                                                                                                                                                                                                                                                                                                                                                                                                                                                                                                                                                                                                                                                                                                                                                                                                                                                                                                                                                                                                                                                                                                                                                                                                                                                                                                                                                                                                                                                                                                                                                                                                                                                                                                                                                                                                                                                                                                                                                                                                                                                                                                                                                                                                                                                                                                                                                                                               | 0.85                                                                      | 0.91                             |                                  |
| Oerlemans, M. I. F. et al. 2012 [21] | miR-1<br>miR-208a-1<br>miR-133a-1<br>miR-146a            | The Netherlands<br>ED admission                            | 106 ACS patients (82 with NSTEMI, 24 with IAF)<br>Age: 68.7±12.6<br>Sex (m/f): 70/36                                                   | 226 non-ACS patients with CHD<br>Age: 67.2±14.3<br>Sex (m/f): 120/106                  | Serum         | Patients were enrolled at the ED of the Maastricht Medical Center (Maastricht, the Netherlands) between May 2007 and November 2007. STEMI—these patients underwent immediate PPCI or referral to a hospital informed consent for the early exclusion criteria | (1) TRIzol LS reagent<br>(2) qPCR, TaqMan<br>(3) Small nuclear RNA U6                                                                           | Yes           | 10                     | NSTEMI<br><3 h<br>3–6 h<br>6–12 h<br>12–24 h<br>24–48 h<br>48–72 h<br>72–96 h<br>96–144 h<br>144–216 h<br>216–360 h<br>360–504 h<br>504–720 h<br>720–1008 h<br>1008–1440 h<br>1440–2160 h<br>2160–3600 h<br>3600–5040 h<br>5040–7200 h<br>7200–10080 h<br>10080–14400 h<br>14400–21600 h<br>21600–36000 h<br>36000–50400 h<br>50400–72000 h<br>72000–100800 h<br>100800–144000 h<br>144000–216000 h<br>216000–360000 h<br>360000–504000 h<br>504000–720000 h<br>720000–1008000 h<br>1008000–1440000 h<br>1440000–2160000 h<br>2160000–3600000 h<br>3600000–5040000 h<br>5040000–7200000 h<br>7200000–10080000 h<br>10080000–14400000 h<br>14400000–21600000 h<br>21600000–36000000 h<br>36000000–50400000 h<br>50400000–72000000 h<br>72000000–100800000 h<br>100800000–144000000 h<br>144000000–216000000 h<br>216000000–360000000 h<br>360000000–504000000 h<br>504000000–720000000 h<br>720000000–1008000000 h<br>1008000000–1440000000 h<br>1440000000–2160000000 h<br>2160000000–3600000000 h<br>3600000000–5040000000 h<br>5040000000–7200000000 h<br>7200000000–10080000000 h<br>10080000000–14400000000 h<br>14400000000–21600000000 h<br>21600000000–36000000000 h<br>36000000000–50400000000 h<br>50400000000–72000000000 h<br>72000000000–100800000000 h<br>100800000000–144000000000 h<br>144000000000–216000000000 h<br>216000000000–360000000000 h<br>360000000000–504000000000 h<br>504000000000–720000000000 h<br>720000000000–1008000000000 h<br>1008000000000–1440000000000 h<br>1440000000000–2160000000000 h<br>2160000000000–3600000000000 h<br>3600000000000–5040000000000 h<br>5040000000000–7200000000000 h<br>7200000000000–10080000000000 h<br>10080000000000–14400000000000 h<br>14400000000000–21600000000000 h<br>21600000000000–36000000000000 h<br>36000000000000–50400000000000 h<br>50400000000000–72000000000000 h<br>72000000000000–100800000000000 h<br>100800000000000–144000000000000 h<br>144000000000000–216000000000000 h<br>216000000000000–360000000000000 h<br>360000000000000–504000000000000 h<br>504000000000000–720000000000000 h<br>720000000000000–1008000000000000 h<br>1008000000000000–1440000000000000 h<br>1440000000000000–2160000000000000 h<br>2160000000000000–3600000000000000 h<br>3600000000000000–5040000000000000 h<br>5040000000000000–7200000000000000 h<br>7200000000000000–10080000000000000 h<br>10080000000000000–14400000000000000 h<br>14400000000000000–2160000000 |                             |                                                                                                                |                                 |                                                                           |                                                                                                                                                                                                                                                                                                                                                                                                                                                                                                                                                                                                                                                                                                                                                                                                                                                                                                                                                                                                                                                                                                                                                                                                                                                                                                                                                                                                                                                                                                                                                                                                                                                                                                                                                                                                                                                                                                                                                                                                                                                                                                                                                                                                                                                                                                                                                                                                                                                                                                                                                                                                                                                                                                                                                                                                                                                                                                                                                                                                                                                                                                                                                                                                                                                                                                                                                                                                                                                                                                                                                                                                                                                                                                                                                                                                                                                                                                                                                                                                                                                                                                                                                                                                                                                                                                                                                                                                                                                                                                                                                                                                                                                                                                                                                                                                                                                                                                                                                                                                                                                                                                                                                                                                                                                                                                                                                                                                                                                                                                                                                                                                                                                                                                                                                                                                                                                                                                                                                                                                                                                                                                                                                                                                                                                                                                    |                                                                           |                                  |                                  |
