# Supplementary material for: MiRNAs as Biomarkers of Myocardial Infarction: A Meta-Analysis
Source: PubMed Central journal article supplement (PMC3922900; doi:10.1371/journal.pone.0088566), 2014-02-12
Supplement: pone.0088566.s002.pdf [file pone.0088566.s002.pdf]

**Table S2** QUADAS studies of diagnostic test accuracy.

Criteria were taken from Whiting et al. and modified for this review (2003)

|                                      | Representative spectrum | Acceptable reference standard | Acceptable delay between tests | Partial verification avoided | Differential verification avoided | Incorporation avoided | Reference standard results blinded | Index test results blinded | Inclusion criteria defined | Characteristics described (age and sex) | Multivariate analysis performed | Confounders comparable at baseline, adjusted for analysis and study design |
|--------------------------------------|-------------------------|-------------------------------|--------------------------------|------------------------------|-----------------------------------|-----------------------|------------------------------------|----------------------------|----------------------------|-----------------------------------------|---------------------------------|----------------------------------------------------------------------------|
| Adachi, T. et al. 2010 [11]          | ?                       | ?                             | +                              | +                            | +                                 | +                     | —                                  | —                          | —                          | +                                       | —                               | —                                                                          |
| Ai, J. et al. 2010 [12]              | ?                       | +                             | ?                              | +                            | +                                 | +                     | —                                  | —                          | +                          | +                                       | —                               | —                                                                          |
| Cheng, Y. et al. 2010 [13]           | +                       | +                             | +                              | +                            | +                                 | +                     | —                                  | —                          | +                          | +                                       | —                               | —                                                                          |
| Corsten, M.F. et al. 2010 [14]       | ?                       | +                             | +                              | +                            | +                                 | +                     | —                                  | —                          | +                          | +                                       | —                               | —                                                                          |
| D'Alessandra, Y. et al. 2010 [15]    | —                       | +                             | +                              | +                            | +                                 | +                     | —                                  | —                          | +                          | +                                       | +                               | +                                                                          |
| Gidlof, O. et al. 2011 [16]          | —                       | +                             | +                              | +                            | +                                 | +                     | —                                  | —                          | +                          | +                                       | —                               | —                                                                          |
| Kuwabara, Y. et al. 2011 [17]        | +                       | +                             | +                              | +                            | +                                 | +                     | —                                  | —                          | +                          | +                                       | —                               | —                                                                          |
| Long, G. et al. 2012 [18]            | ?                       | +                             | +                              | +                            | +                                 | +                     | —                                  | —                          | +                          | +                                       | —                               | —                                                                          |
| Long, G. et al. 2012 [19]            | ?                       | +                             | +                              | +                            | +                                 | +                     | —                                  | —                          | +                          | +                                       | —                               | —                                                                          |
| Meder B. et al. 2011 [20]            | —                       | +                             | +                              | +                            | +                                 | +                     | —                                  | —                          | +                          | +                                       | —                               | —                                                                          |
| Oerlemans, M.I.F.J. et al. 2012 [21] | +                       | +                             | +                              | +                            | +                                 | +                     | —                                  | —                          | +                          | +                                       | +                               | +                                                                          |
| Olivieri, F. et al. 2012 [22]        | —                       | +                             | +                              | +                            | +                                 | +                     | —                                  | —                          | +                          | +                                       | +                               | +                                                                          |
| Wang, GK. et al 2010 [23]            | +                       | +                             | +                              | +                            | +                                 | +                     | —                                  | —                          | +                          | +                                       | —                               | —                                                                          |
| Wang, R. et al. 2011 [24]            | ?                       | +                             | +                              | +                            | +                                 | +                     | —                                  | —                          | +                          | +                                       | —                               | —                                                                          |
| Devaux, Y. et al. 2012 [25]          | +                       | +                             | +                              | +                            | +                                 | +                     | —                                  | —                          | +                          | +                                       | +                               | +                                                                          |
| Vogel, B. et al. 2013 [26]           | ?                       | +                             | +                              | +                            | +                                 | +                     | —                                  | —                          | +                          | +                                       | —                               | —                                                                          |
| Gidlof, O. et al. 2013 [37]          | +                       | +                             | +                              | +                            | +                                 | +                     | —                                  | —                          | +                          | +                                       | —                               | —                                                                          |
| Li, C. J. et al. 2013 [38]           | +                       | +                             | +                              | +                            | +                                 | +                     | —                                  | —                          | +                          | +                                       | —                               | +                                                                          |
| Li, Y. Q. et al. 2013 [39]           | +                       | +                             | +                              | +                            | +                                 | +                     | —                                  | —                          | +                          | +                                       | —                               | +                                                                          |

+: Yes; —: No; ?: unclear
